# Supplementary material
Source: publisher figshare collection journal article supplement (https://tandf.figshare.com/ndownloader/files/30770636)
Supplement: Supplementary file 1 [file 30770636]

**Supplementary Figure 1.** Alignment of the predicted P2 amino acid sequence of *B. passiflorae* with the P2 sequence of other member of the genus *Badnavirus* confirms the identity of this protein.

**
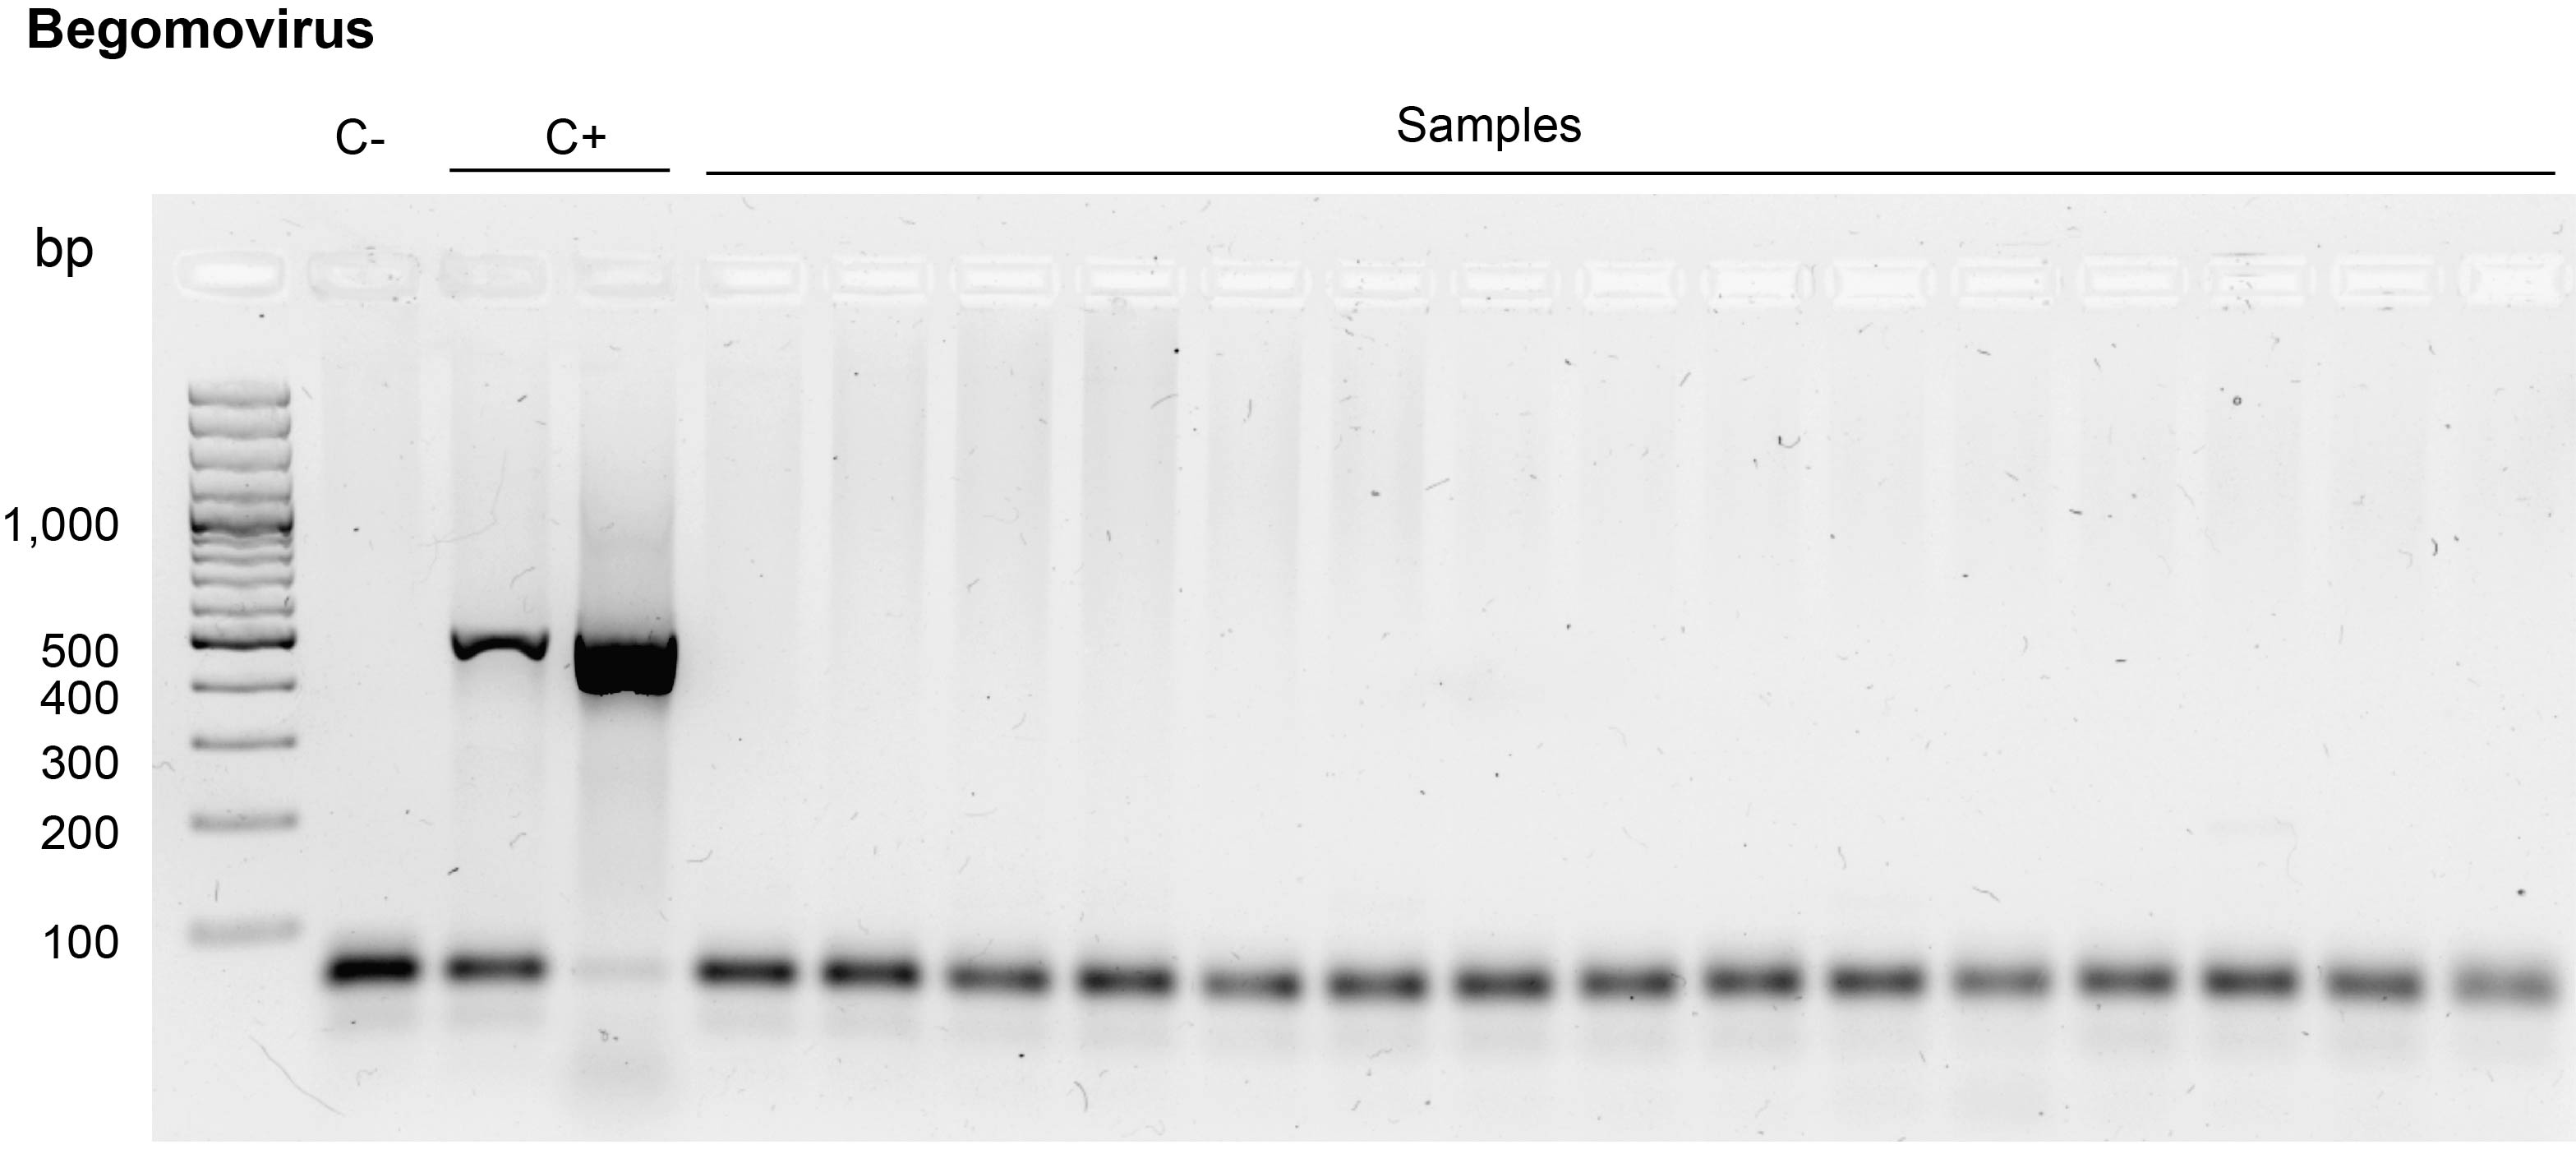
**

**Supplementary Figure 2.** PCR amplification of samples using begomovirus specific primers failed to detect this group of viruses in all the purple passion fruit samples tested.
